# Supplementary material
Source: Springer Nature journal article supplement (https://www.springermedizin.de/resource/supplementary/12885_2013_4158_MOESM5_ESM.pdf/9465614)

**A**      Marker      Blank      3xFLAG      RKIP-3xFLAG

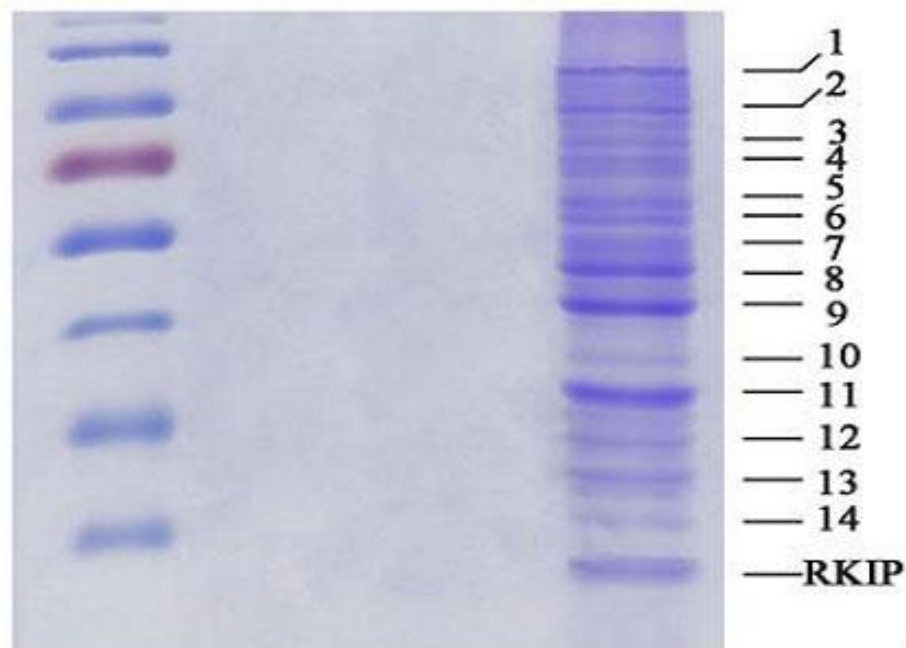

**B**      Blank      3xFLAG      RKIP-3xFLAG

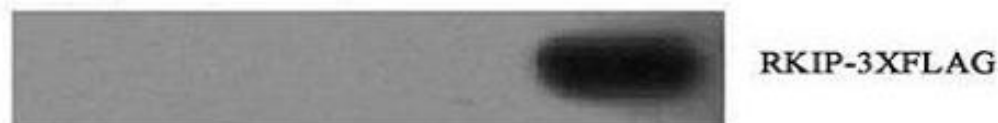

Supplement: MOESM5 [file 9465614]
